# Supplementary material
Source: PubMed Central journal article supplement (PMC5570682)

**Supplementary Figure S1. Maximum change in paraprotein from baseline.**

For patients with >100% change in paraprotein, the change is truncated at 100%. S, serum M-protein; U, urine M-protein; F, free light chain.

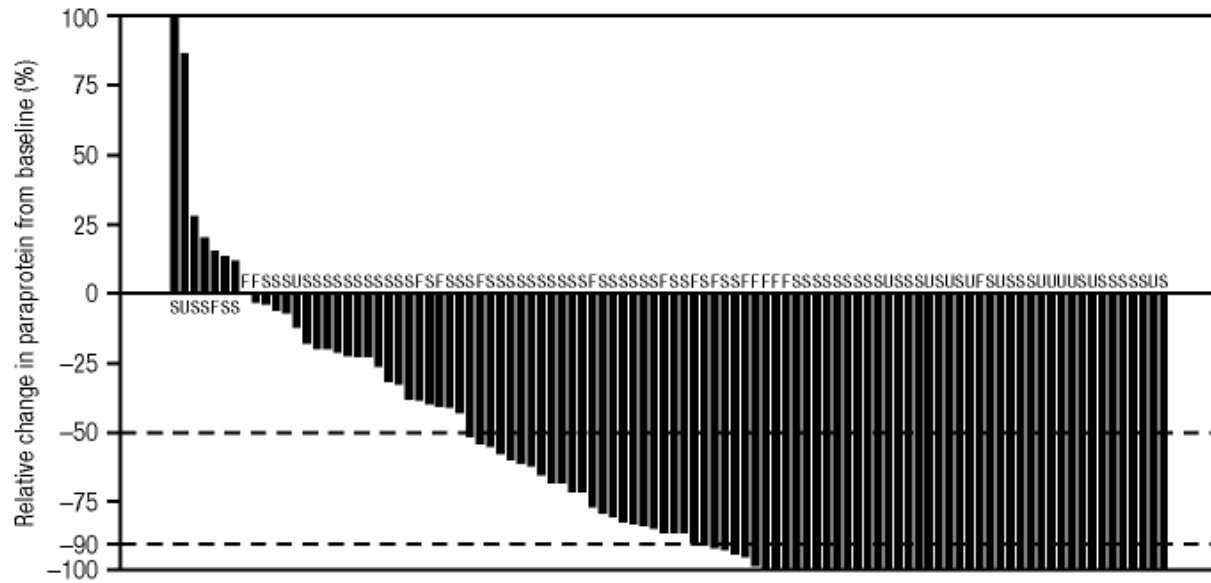

Supplement: blood785246-suppl1.pdf [file blood785246-suppl1.pdf]
